# Supplementary material for: EIF2A-dependent translational arrest protects leukemia cells from the energetic stress induced by NAMPT inhibition
Source: Springer Nature journal article supplement (doi:10.1186/s12885-015-1845-1), 2015-11-05

## Additional file 2

**A**

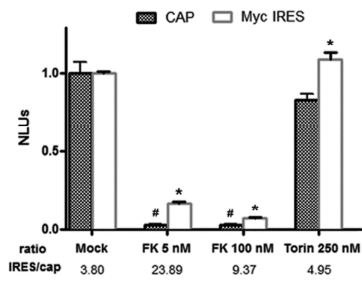

**B**

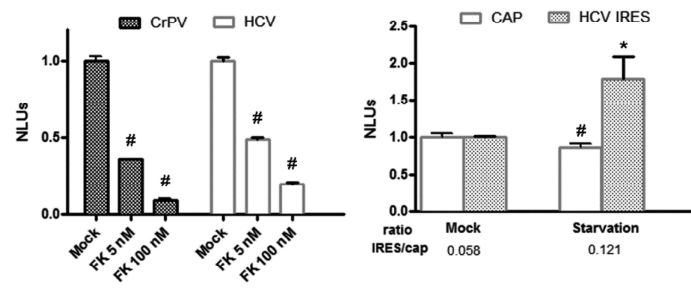

Supplement: MOESM2 [file 9745474]
