# Supplementary material for: EIF2A-dependent translational arrest protects leukemia cells from the energetic stress induced by NAMPT inhibition
Source: Springer Nature journal article supplement (doi:10.1186/s12885-015-1845-1), 2015-11-05

# Additional file 3

## A

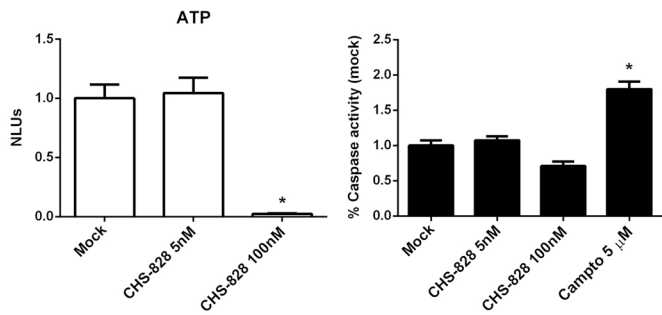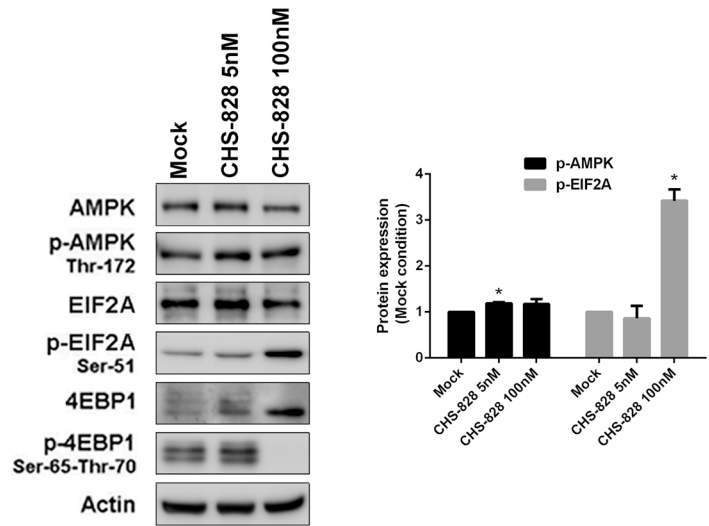

## B

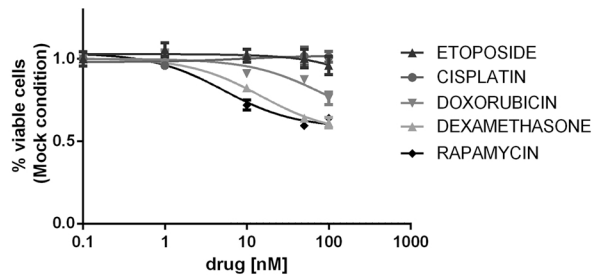

|                       | Doxorubicin | Dexamethasone | Rapamycin |
|-----------------------|-------------|---------------|-----------|
| EC <sub>50</sub> (nM) | 81.24       | 21.19         | 5.21      |
| R <sup>2</sup>        | 0.7332      | 0.9290        | 0.9161    |

## C

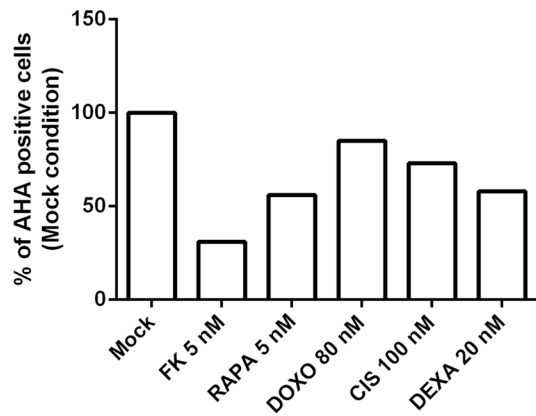

## D

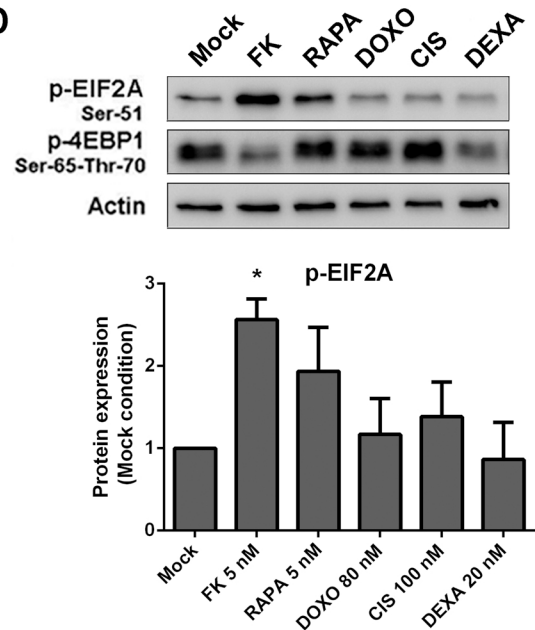

## E

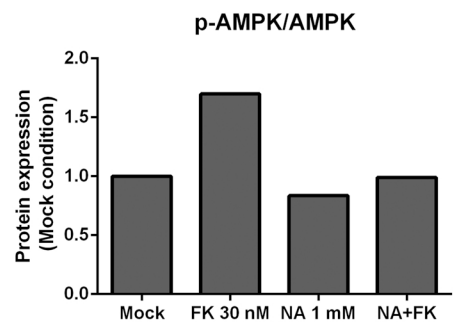

Supplement: MOESM3 [file 9745474]
