# Supplementary material for: EIF2A-dependent translational arrest protects leukemia cells from the energetic stress induced by NAMPT inhibition
Source: Springer Nature journal article supplement (doi:10.1186/s12885-015-1845-1), 2015-11-05

# Additional file 4

## A

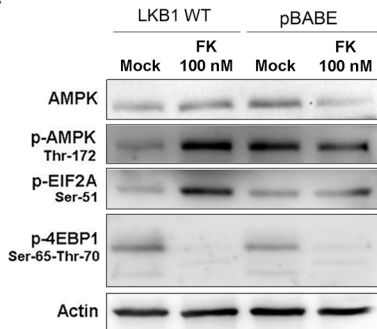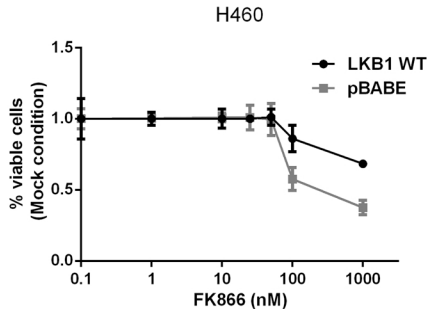

| H460                  | LKB1 WT | pBABE |
|-----------------------|---------|-------|
| EC <sub>50</sub> (nM) | 102.0   | 84.3  |
| R <sup>2</sup>        | 0.7841  | 0.945 |

## B

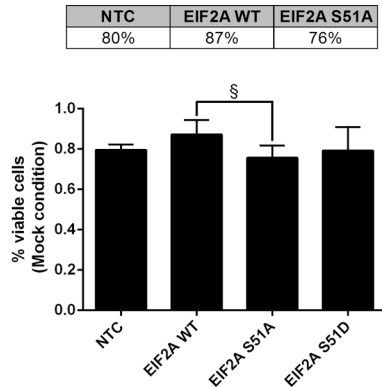

Supplement: MOESM4 [file 9745474]
